# Supplementary material for: Expression of CD47 and SIRPα Macrophage Immune-Checkpoint Pathway in Non-Small-Cell Lung Cancer
Source: MDPI journal article supplement (doi:10.3390/cancers14071801), 2022-04-01
Supplement: s1 [file s1]

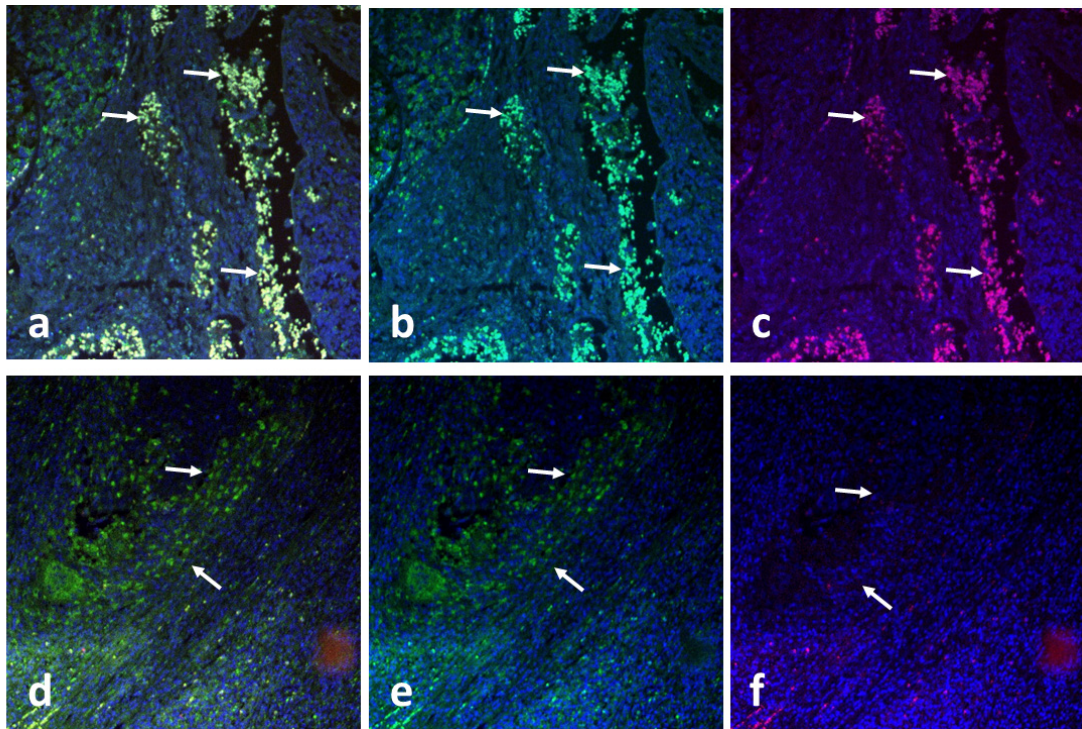

**Supplemental Figure S1.** Triple CD68/SIRP $\alpha$  immunofluorescence with Hoechst 33,342 (blue staining of cell nuclei) confocal images of lung cancer tissue. White arrows show the areas of macrophage infiltration. (a–c) A cancer tissue section showing intense tumor stroma infiltration by CD68+ (green; b) and SIRP $\alpha$ + (red; c) macrophages, with extensive co-localization (yellow; a); white arrows. (d–f) A cancer tissue section showing intense tumor stroma infiltration by CD68+ (green; e), scarce presence of SIRP $\alpha$ + macrophages (red; f), and lack scarce co-localization (yellow; d); white arrows.
